1 **Mediator subunit MDT-15/MED15 and Nuclear Receptor HIZR-1/HNF4 cooperate to regulate**  
2 **toxic metal stress responses in *Caenorhabditis elegans***

3  
4 Naomi Shomer<sup>1-3,#</sup>, Alexandre Zacharie Kadhim<sup>1-3,#</sup>, Jennifer Margaret Grants<sup>1-3,#</sup>, Xuanjin Cheng<sup>2,3</sup>,  
5 Amy Fong-Yuk Poon<sup>2,3</sup>, Michelle Ying Ya Lee<sup>2,3</sup>, Forum Bhanshali<sup>2,3\*</sup>, Anik Muhuri<sup>2,3</sup>, Jung In  
6 Park<sup>2,3</sup>, Dongyeop Lee<sup>5</sup>, Seung-Jae V. Lee<sup>6</sup>, Francis Christopher Lynn<sup>3,4,7</sup>, and Stefan Taubert<sup>1-4,8</sup>

7  
8 <sup>1</sup>Graduate Program in Medical Genetics, <sup>2</sup>Centre for Molecular Medicine and Therapeutics, <sup>3</sup>BC  
9 Children's Hospital Research Institute, <sup>4</sup>Graduate Program in Cell & Developmental Biology,  
10 University of British Columbia, 950 W 28<sup>th</sup> Ave, Vancouver, BC V5Z 4H4, Canada; <sup>5</sup>Department of  
11 Life Sciences, School of Interdisciplinary Bioscience and Bioengineering, ITCE, Pohang University of  
12 Science and Technology, 77 Cheongam-Ro, Nam-Gu, Pohang, Gyeongbuk, 37673, South Korea,  
13 <sup>6</sup>Department of Biological Sciences, Korea Advanced Institute of Science and Technology, 291  
14 Daehak-Ro, Yuseong-Gu, Daejeon, 34141, South Korea, <sup>7</sup>Department of Surgery, and <sup>8</sup>Department of  
15 Medical Genetics, University of British Columbia, 950 W 28<sup>th</sup> Ave, Vancouver, BC V5Z 4H4, Canada

16  
17 \*Current address: Terramera Inc., 333 Seymour St, Vancouver, BC V6B 5A6, Canada

18  
19 Corresponding author: Stefan Taubert

20 #Authors contributed equally to this work

21  
22 Keywords: Mediator complex, cadmium, zinc, HNF4 $\alpha$ ,  $\beta$ -cell

23  
24 Short title: MDT-15/MED15 and HIZR-1/HNF4 protect against toxic metals

26 **Abstract**

27 Zinc is essential for cellular functions as it is a catalytic and structural component of many  
28 proteins. In contrast, cadmium is not required in biological systems and is toxic. Zinc and cadmium  
29 levels are closely monitored and regulated as their excess causes cell stress. To maintain homeostasis,  
30 organisms induce metal detoxification gene programs through stress responsive transcriptional  
31 regulatory complexes. In *Caenorhabditis elegans*, the MDT-15 subunit of the evolutionarily conserved  
32 Mediator transcriptional coregulator is required to induce genes upon exposure to excess zinc and  
33 cadmium. However, the regulatory partners of MDT-15 in this response, its role in cellular and  
34 physiological stress adaptation, and the putative role mammalian for MED15 in the metal stress  
35 responses remain unknown. Here, we show that MDT-15 interacts physically and functionally with the  
36 Nuclear Hormone Receptor HIZR-1 to promote molecular, cellular, and organismal adaptation to  
37 excess metals. Using gain- and loss-of-function mutants and qPCR and reporter analysis, we find that  
38 *mdt-15* and *hizr-1* cooperate to induce zinc and cadmium responsive genes. Moreover, the two proteins  
39 interact physically in yeast-two-hybrid assays and this interaction is enhanced by the addition of zinc or  
40 cadmium, the former a known ligand of HIZR-1. Functionally, *mdt-15* and *hizr-1* mutants show  
41 defective storage of excess zinc in the gut, and at the organismal level, *mdt-15* mutants are  
42 hypersensitive to zinc- and cadmium-induced reductions in egg-laying. Lastly, mammalian MDT-15  
43 orthologs bind genomic regulatory regions of metallothionein and zinc transporter genes in a metal-  
44 stimulated fashion, and human MED15 is required to induce a metallothionein gene in lung  
45 adenocarcinoma cells exposed to cadmium. Collectively, our data show that *mdt-15* and *hizr-1*  
46 cooperate to regulate metal detoxification and zinc storage and that this mechanism appears to be at  
47 least partially conserved in mammals.

## 48           **Introduction**

49           In their habitats, biological organisms encounter many metals, including essential  
50           micronutrients such as iron, zinc, copper, and manganese, and toxic metals such as cadmium, mercury,  
51           lead, and arsenic. Zinc is an essential trace element that plays a crucial role in numerous cellular and  
52           physiological processes (1). It has a structural role in metabolic enzymes, growth factors, and  
53           transcriptional regulators such as zinc finger proteins, and is also an enzymatic cofactor and a signaling  
54           molecule (2,3). Accordingly, zinc is necessary for the function of approximately 10% of proteins in the  
55           human proteome and approximately 8% of proteins in the nematode worm *Caenorhabditis elegans* (4).  
56           In line with its requirement in diverse proteins, zinc deficiency causes a broad range of symptoms and  
57           dysfunctions in humans, such as skin and eye lesions, thymic atrophy, diarrhea, defective wound  
58           healing, and others (5,6). *Vice versa*, exposure to high doses of zinc is also detrimental, as it has toxic  
59           effects, causes cell stress, and alters physiological programs such as systemic growth, immune  
60           responses, and neuro-sensory and endocrine functions (5).

61           Unlike zinc, cadmium is a non-essential toxic metal encountered by biological organisms as a  
62           naturally occurring and industrial environmental contaminant. Cadmium has no known function in  
63           biological systems, and exposure causes intracellular damage along with the production of reactive  
64           oxygen species (7). In humans, cadmium exposure can result in respiratory disease, kidney damage,  
65           neurological disorders, and various types of cancers (7,8). Interestingly, zinc and cadmium share a  
66           similar electron configuration; thus, cadmium may substitute for zinc at the molecular level, for  
67           example as an enzyme cofactor, thus reducing or abrogating normal protein function (9).

68           Another consequence of the elemental similarity is that the biological responses to and the  
69           systemic detoxification of zinc and cadmium are similar (2,5,10,11). Key detoxification and  
70           homeostasis components include metal-sequestering proteins such as metallothioneins (MTs), which  
71           bind a wide range of metals including cadmium, lead, zinc, mercury, copper, and others. MTs appear to  
72           regulate the uptake, transport, and regulation of zinc in biological system, and also scavenge reactive

73 oxygen species such superoxide (12). Other important detoxification and homeostasis components  
74 include transporters such as the cation diffusion facilitators (CDF; also known as zinc transporter (ZnT)  
75 or solute carrier 30 (SLC30) family proteins) that transport zinc into the cytoplasm, and the Zrt- and Irt-  
76 like proteins (ZIP; aka SLC39A family proteins) that transport zinc out of the cytoplasm (13,14).

77 To maintain homeostasis in the face of changing metal levels, transcriptional regulatory  
78 mechanisms adjust gene expression as needed. Metal-responsive transcription factor-1 (MTF-1) is a  
79 transcription factor that is evolutionarily conserved from insects to humans. It binds metal responsive  
80 elements (MREs) in the promoters of target genes (e.g. metallothioneins) and activates their expression  
81 when metals such as zinc are in excess (15-17). MTF-1 directly senses zinc with its six zinc fingers and  
82 with an acidic, metal-responsive transcriptional activation domain; related metals such as cadmium  
83 appear not to directly bind MTF-1 and instead are likely detected indirectly through the altered  
84 availability of zinc. Additional, unknown transcription factors and/or activation mechanism likely  
85 control gene expression in response to excess zinc in these organisms, as some genes are regulated  
86 independently of MTF-1 and MREs in such conditions (16,18). Recent studies in *C. elegans*, whose  
87 genome lacks a detectable MTF-1 ortholog despite the presence of MREs, revealed that the activation  
88 of genes in conditions of high zinc requires the High Zinc Activated (HZA) element and the HZA-  
89 binding Nuclear Hormone Receptor high-zinc-activated nuclear receptor 1 (HIZR-1; aka NHR-33)  
90 (19,20). HIZR-1 is a sequence homolog of mammalian Hepatocyte Nuclear Factor 4 (HNF4) (20,21),  
91 but whether HNF4 proteins regulate gene expression in response to high metal concentrations in  
92 mammals remains unknown.

93 To effectively and specifically activate gene expression, transcription factors require accessory  
94 proteins termed coregulators (22-24). One important coregulator is Mediator, a ~30 protein subunit  
95 complex that is conserved from yeast to human (25,26). Individual Mediator subunits selectively  
96 engage transcription factors and thus regulate specific developmental and physiological gene programs.  
97 For example, Mediator subunit MDT-15/Med15 and Mediator kinase cyclin dependent kinase 8 (CDK-

98 8) are required for many stress and adaptive responses across species (26-31). In the context of heavy  
99 metal responsive transcription, *Drosophila melanogaster* MTF-1 requires Mediator for gene activation  
100 via MREs in response to excess metals (17,32). In *C. elegans*, we showed that Mediator subunit *mdt-15*  
101 is required for the induction of zinc and cadmium responsive genes (33). Others found that zinc-  
102 dependent activation via the HZA element required *mdt-15* at one extrachromosomal promoter reporter  
103 (19). As MDT-15 is a known coregulator of HNF4-like NHRs in *C. elegans* (34-37), this suggests that  
104 MDT-15 may cooperate with the HZA-binding HIZR-1 to adapt gene expression in response to high  
105 zinc in *C. elegans*.

106 Here, we tested whether MDT-15 and HIZR-1 cooperate to regulate zinc and cadmium  
107 responsive transcription in *C. elegans* and whether MED15, the mammalian ortholog of MDT-15, also  
108 participates in heavy metal stress responses. Because the Mediator kinase CDK-8 regulates  
109 transcriptional stress responses (30,31), we also assessed the function of *C. elegans cdk-8* in metal  
110 responsive transcription. Using genetic, molecular, cytological, and functional assays, we find that  
111 MDT-15 and HIZR-1 interact physically and functionally in zinc and cadmium stress responses, and  
112 that mammalian MED15 is recruited to metal responsive genes and required for metal-induced gene  
113 expression.

114

115 **Results**

116 ***mdt-15* and *cdk-8* are necessary for cadmium- and zinc-induced gene activation**

117 We previously showed that *mdt-15* is required to induce the mRNA levels of several genes in  
118 response to high levels of zinc and cadmium (33). In line with this finding, genes downregulated in  
119 *mdt-15(tm2182)* hypomorph mutants showed significant overlap with cadmium-induced genes (Fig  
120 1A). Similarly, cadmium-induced genes overlap significantly with genes downregulated in *cdk-8*  
121 (*tm1238*) null mutants (Fig 1B), suggesting that *cdk-8* plays a similar role as *mdt-15*. To test the  
122 requirement of *cdk-8* in cadmium detoxification and to assess its role in the zinc response, we used  
123 real-time quantitative PCR (qPCR) to measure the mRNA levels of metallothioneins (*mtl-1*, *mtl-2*),  
124 zinc transporters (ZnT) implicated in cadmium and zinc detoxification (*ttm-1*, *cdf-2*), and the cadmium  
125 responsive gene *cdr-1* (10,20,33). Comparing wild-type worms and *cdk-8(tm1238)* mutants, we  
126 observed a significant decrease of *cdr-1* mRNA levels upon exposure to cadmium and of *mtl-2* mRNA  
127 levels upon exposure to zinc; other metal responsive genes showed a similar trend but were not  
128 significantly altered (Fig 1C-D). Thus, *cdk-8* is required for maximal gene expression in response to  
129 zinc or cadmium, but this requirement is less prevalent and substantial than the one we previously  
130 observed for *mdt-15* (33).

131  
132 ***hizr-1* and *elt-2* are required to induce the *cdr-1* promoter**

133 To delineate the mechanism of MDT-15 and CDK-8 driven, cadmium and zinc responsive  
134 transcription, we generated a transcriptional *cdr-1p::gfp* reporter, encompassing 2.8 kb of the *cdr-1*  
135 promoter (Fig 2A). We chose *cdr-1* as a model because it is highly cadmium and zinc responsive and  
136 requires *mdt-15* and *cdk-8* for activation (10,33,38), suggesting that it might be a good tool to identify  
137 DNA regulatory elements and cognate transcription factors that cooperate with these Mediator  
138 subunits. As expected (10,33,38), we observed weak basal expression of this reporter, but substantial  
139 induction of fluorescence by 200 $\mu$ M zinc and 100 $\mu$ M cadmium (Fig S1A-B); expression was primarily

140 localized to the intestine (Fig S1A-B), as expected (10,38). Knockdown of *mdt-15* by feeding RNA  
141 interference (RNAi) caused a significant decrease in basal *cdr-1p::gfp* fluorescence and abrogated  
142 fluorescence induction by cadmium and zinc (Fig 2B). Similarly, *cdk-8(tm1238); cdr-1p::gfp* worms  
143 showed a significant decrease in basal and metal-induced fluorescence (Fig 2B).

144 To identify transcription factors that cooperate with *cdk-8* and *mdt-15* to regulate cadmium and  
145 zinc responsive transcription, we searched for DNA regulatory elements in the *cdr-1* promoter. We  
146 identified candidate elements recognized by SKN-1/Nrf2 (antioxidant response element, ARE), HSF-1  
147 (heat shock response element, HSE), DAF-16/FOXO (DAF-16 binding element, DBE), ELT-2 (GATA  
148 element), and HIZR-1 (HZA element), as well as four MREs, which no *C. elegans* transcription factor  
149 is yet known to bind (Fig 2A). RNAi analysis revealed that *skn-1*, *hsf-1*, and *daf-16* are not required for  
150 *cdr-1* induction by cadmium; *daf-16* depletion actually hyper-induced the *cdr-1p::gfp* promoter (Fig  
151 2C). In contrast, knocking down *elt-2* or *hizr-1* abrogated fluorescence induction (Fig 2C). As *elt-2* is  
152 required for intestinal development (39), we examined post-developmental *elt-2* knockdown, which  
153 also caused abrogation of basal and cadmium-induced *cdr-1p::gfp* expression (Fig S1C). Thus, *elt-2* is  
154 required at the *cdr-1* promoter independently of its role in development.

155 We confirmed the requirements for *elt-2* and *hizr-1* by site-directed mutagenesis of their  
156 cognate DNA elements. We generated substitution mutations in the HZA (*mutHZA*) or GATA sites  
157 (*mutGATA1* and *mutGATA2*) of the *cdr-1p::gfp* reporter (Fig 2A). Each mutation individually caused a  
158 significant decrease in cadmium-induced promoter activity compared to the wild-type *cdr-1p::gfp*  
159 reporter; mutations in the HZA elements also caused a significant decrease in the basal activity of the  
160 *cdr-1p::gfp* reporter (Fig 2D). Collectively, these data show that Mediator subunits MDT-15 and CDK-  
161 8 and the transcription factors ELT-2 and HIZR-1 are required to control expression from the  
162 cadmium/zinc-inducible *cdr-1* promoter.

163

164 ***mdt-15* and *hizr-1* function is co-dependent**

165 Based on the above data, we hypothesized that MDT-15 and/or CDK-8 might interact  
166 functionally and physically with HIZR-1 and/or ELT-2 to activate metal-induced transcription. To  
167 examine a putative functional relationship between MDT-15 and HIZR-1, we studied the *hizr-*  
168 *1(am285)* D270N gain-of-function (gf) mutant that induces zinc responsive genes even in the absence  
169 of zinc (20). In line with published data (20), qPCR analysis revealed induction of *cdr-1*, *mtl-1*, *mtl-2*,  
170 and *cdf-2* in *hizr-1(am285)* mutants grown on control RNAi; importantly, *mdt-15* RNAi significantly  
171 reduced or abrogated these inductions (Fig 3A). Next, we studied the *mdt-15(et14)* P117L gain-of-  
172 function (gf) mutation that induces MDT-15 regulated lipid metabolism genes (40). Because this  
173 mutation is closely linked to a *paqr-1(3410)* loss-of-function mutation, which it suppresses (40), we  
174 used the *mdt-15(yh8)* strain, which was generated by CRISPR and carries P117L alone (41). The *mdt-*  
175 *15(yh8)* gf mutation was sufficient to induce *mtl-1* and *mtl-2* (Fig 3B); RNAi experiments revealed that  
176 *mtl-2* induction required *hizr-1*, with a similar trend for *mtl-1* (Fig 3B). In contrast, *nhr-49*, which  
177 cooperates with MDT-15 to activate lipid metabolism and stress response genes (34,36), was not  
178 required to induce metal-responsive genes in the *mdt-15(yh8)* mutant (Fig 3B). We conclude that  
179 MDT-15 and HIZR-1 interact specifically to induce metal responsive genes *in vivo*.

180

### 181 **MDT-15 physically interacts with HIZR-1 in zinc-enhanced fashion**

182 The above data suggest that MDT-15 might interact physically with HIZR-1, as shown for other  
183 *C. elegans* HNF4-like NHRs (34,35). To test whether HIZR-1 binds MDT-15, we used the yeast-two-  
184 hybrid (Y2H) system. First, we examined the interaction between a full length HIZR-1 prey and a  
185 MDT-15- $\Delta$ ACT bait (aa 1-600); full-length MDT-15 (aa 1-780) autoactivates and cannot be used as bait  
186 in Y2H assays (see (42) for details). In these assays, MDT-15 and HIZR-1 showed a statistically  
187 significant interaction that was similar in strength to the interaction of the MDT-15- $\Delta$ ACT bait with a  
188 SKN-1c prey (positive control (42); Fig 3C).



189           The HIZR-1 ligand binding domain (LBD) binds zinc in the micromolar range, suggesting that  
190 zinc is a *bona fide* ligand for HIZR-1 (20). We hypothesized that the addition of zinc might enhance the  
191 interaction of HIZR-1 with MDT-15, as shown for other many other ligand-stimulated NHR-  
192 coregulator interactions. Indeed, addition of zinc enhanced the interaction between MDT-15 and HIZR-  
193 1, with significant effects at low micromolar concentrations (Figs 3D, S2A). As *mdt-15* also contributes  
194 to cadmium-induced gene expression, we tested whether this metal also enhanced MDT-15 binding to  
195 HIZR-1 and found that this was the case (Fig 3D). In contrast, manganese did not enhance the binding  
196 of MDT-15 with HIZR-1 (Fig 3D).

197           NHRs contain a zinc-finger DNA binding domain (DBD), suggesting that zinc-stimulated  
198 binding to a coregulator such as MDT-15 might be a common feature of NHRs. To examine the  
199 specificity of zinc- and cadmium-stimulated MDT-15–NHR interaction, we examined whether these  
200 metals alter the binding of two other known MDT-15 binding partners, NHR-64 and NHR-49 (34). We  
201 found that NHR-64 interacts with MDT-15 as strongly as HIZR-1 does in the presence of zinc or  
202 cadmium, while NHR-49 binding to MDT-15 mimics the interaction of HIZR-1 and MDT-15 in the  
203 absence of zinc; importantly, neither NHR-64 nor NHR-49 binding to MDT-15 was altered by  
204 supplementation with zinc, cadmium, or manganese at eth concentrations that significantly enhanced  
205 binding of HIZR-1 to MDT-15 (Fig 3D). We conclude that metal-stimulation of MDT-15 interaction is  
206 not a general feature of NHRs but specific to HIZR-1.

207

### 208           **Binding determinants in MDT-15 and HIZR-1**

209           MDT-15 contains an N-terminal KIX-domain that binds several NHRs and the lipogenic  
210 transcription factor SBP-1 (34,35,43). Thus, we hypothesized that MDT-15 might physically bind  
211 HIZR-1 through the KIX-domain (aa 1-124; Fig S2B). To test this hypothesis, we assayed binding of  
212 HIZR-1 to an MDT-15-KIX-domain and to an MDT-15 $\Delta$ ACT variant lacking the KIX-domain (MDT-  
213 15 $\Delta$ KIX $\Delta$ ACT; aa 125-600). The binding of HIZR-1 to the MDT-15-KIX-domain was similar to the

214 binding to MDT-15 $\Delta$ ACT; in contrast, MDT-15 $\Delta$ KIX $\Delta$ ACT was unable to bind HIZR-1 (Fig S2C). This  
215 indicates that the KIX-domain is necessary and sufficient for the HIZR-1–MDT-15 interaction.

216 The *hizr-1(am285)* gf mutation is an aspartate 270 to asparagine (D270N) substitution that  
217 results in increased nuclear localization and constitutive activation of zinc responsive genes even in the  
218 absence of zinc (20). Sequence comparison revealed that D270 is conserved in the HIZR-1 orthologs of  
219 three other species in the *Caenorhabditis* genus (Fig S2D), suggesting that it may be functionally  
220 important. We hypothesized that the D270N mutation might affect MDT-15 binding. To test this, we  
221 performed Y2H assays with a HIZR-1-D270N prey generated by site-directed mutagenesis. HIZR-1-  
222 D270N interacted more strongly with MDT-15 than did HIZR-1-WT, resembling in strength the WT  
223 HIZR-1–MDT-15 interaction in the presence of zinc (Fig 3E). Nevertheless, supplemental zinc further  
224 enhanced this interaction (Fig 3E), suggesting that, D270 does not mimic the effects of zinc-stimulated  
225 binding.

226

227 ***mdt-15(tm2182)* mutants display zinc storage defects and are hypersensitive to zinc and**  
228 **cadmium**

229 To test whether the defects of *mdt-15(tm2182)* mutants in metal responsive transcription have  
230 functional consequences, we studied two phenotypes: cellular zinc storage and egg-laying. At the  
231 cellular level, gut granules store zinc when it is present in excess, thus protecting cells; *vice versa*, they  
232 replenish zinc in situations of zinc deficiency (44). To study zinc storage in gut granules in wild-type  
233 and mutant worms, we used the zinc-specific fluorescent dye FluoZin-3 (44). We observed little  
234 difference between wild-type, *mdt-15(tm2182)*, *cdk-8(tm1238)*, and *hizr-1(am286)* mutants in “normal”  
235 conditions, i.e. without zinc supplementation (Fig S3A-C). Wild-type worms supplemented with  
236 200mM zinc showed bigger granules with a stronger FluoZin-3 signal (Fig 4A), as reported (44).  
237 Strikingly, *mdt-15(tm2182)* mutants displayed significantly fewer gut granules in high zinc conditions  
238 than wild-type worms and *cdk-8(tm1238)* mutants (Fig 4A-B). As HIZR-1 interacts with MDT-15 in

239 zinc-stimulated fashion, we also studied *hizr-1(am286)* null mutants and found that they also have less  
240 granules than wild-type worms in conditions of excess zinc (Fig 4C).

241 *mdt-15(tm2182)* mutants show reduced expression of several fatty acid metabolism enzymes,  
242 especially fatty acid desaturases such as *fat-6/stearoyl-CoA desaturase*. This causes defects in cell  
243 membrane fatty acid desaturation and directly underlies numerous phenotypes caused by *mdt-15*  
244 deficiency, including slow growth, reduced body size, and short life span (34,41,43,45,46). Altered  
245 membrane lipids in *mdt-15(tm2182)* mutants could cause organelle dysfunction and conceivably affect  
246 zinc storage. Thus, we tested whether *fat-6/stearoyl-CoA desaturase* depletion by RNAi causes defects  
247 in zinc storage (note that *fat-6* depletion also deletes the highly homologous gene *fat-7* (47)). In  
248 contrast to *mdt-15(tm2182)* mutants, however, *fat-6(RNAi)* worms did not show any overt defects in  
249 zinc storage in high zinc conditions (Fig S3D-E). This suggests that the zinc storage defects observed  
250 in the *mdt-15(tm2182)* mutants are not due to altered membrane composition and function.

251 We also assessed the effect of excess zinc and cadmium on an organismal phenotype, egg-  
252 laying (Fig 4D). We found that 100 $\mu$ M zinc decreased the number of eggs laid by wild-type worms by  
253 approximately 30 percent; in contrast, the same concentration of zinc almost completely abolished egg-  
254 laying in *mdt-15(tm2182)* mutants, indicating that this mutant is hyper-sensitive to zinc. Similarly,  
255 2.5 $\mu$ M cadmium reduced the number of eggs laid by wild-type worms by approximately 20 percent,  
256 but almost completely abrogated it in *mdt-15(tm2182)* mutants (Fig 4E), indicating that this mutant is  
257 hyper-sensitive to cadmium. Thus, *mdt-15(tm2182)* mutants are less able than wild-type to resist excess  
258 heavy metals at an organismal level.

259

### 260 **Mammalian MED15 may also regulate metal-induced transcription**

261 To test whether *mdt-15*'s role in regulating metal-responsive transcription is conserved in  
262 mammals we studied the role its human and mouse orthologs, MED15 and Med15 (48), in two cell  
263 lines. First, we studied A549 human epithelial lung adenocarcinoma cells, because cadmium increases

264 lung cancer risk and induces a heavy metal stress response in this cell line (49-51). We depleted  
265 MED15 in A549 cells by transfecting small interfering RNAs (siRNAs) targeting MED15 (vs.  
266 scrambled control), and then exposed the transfected cells to 5 $\mu$ M cadmium for 4 hours. Using qPCR,  
267 we found that cadmium induced the metallothioneins MT1X and MT2A, orthologues of *C. elegans mtl-*  
268 *1* and *-2*, respectively (Fig 5A). Notably, while MT1X was unaffected, MT2A induction was  
269 completely blocked by MED15 depletion (Fig 5A), suggesting that MED15 is required to induce at  
270 least this one gene in response to heavy metal exposure. To test whether MED15 binds to the promoter  
271 of MT2A, we performed chromatin immunoprecipitation followed by qPCR (ChIP-qPCR), assessing  
272 MED15 occupancy before and after the addition of 5 $\mu$ M cadmium to the extracellular media. We found  
273 that MED15 was recruited preferentially to the promoter of MT2A after addition of 5 $\mu$ M cadmium (Fig  
274 5B).

275 We also studied the MIN6 mouse insulinoma cell line because the insulin-secreting  $\beta$ -cells of  
276 the mammalian pancreas require zinc for insulin crystallization and contain among the highest levels of  
277 zinc in the body (14,52,53). ZnT8/SLC30A8, the mouse ortholog of the MDT-15 and HIZR-1 regulated  
278 zinc transporter CDF-2 (44), is expressed highly in the  $\alpha$ - and  $\beta$ -cells of the endocrine pancreas (14).  
279 To test whether the expression of mouse *Slc30a8* and metallothionein genes are induced by excess zinc,  
280 we exposed MIN6 cells to 50 $\mu$ M zinc for 24 hours and assessed expression by qPCR. We observed that  
281 *Slc30a8*, *Mt1*, and *Mt2* are zinc responsive, whereas *Med15* expression did not increase (Fig 5C). To  
282 test whether Med15 directly binds to the promoters of *Slc30a8* and *Mt1*, we performed chromatin  
283 immunoprecipitation followed by qPCR (ChIP-qPCR), assessing Med15 occupancy before and after  
284 the addition of excess zinc to the extracellular media. We found that Med15 was recruited to the  
285 promoters of both *Slc30a8* and *Mt1* in excess zinc (Fig 5D). Collectively, these experiments suggest  
286 that mammalian MED15 proteins directly bind the promoters of metal stress responsive genes and are  
287 required for the induction of at least one cadmium responsive gene in lung adenocarcinoma cells.

288

289 **Discussion**

290 Organisms encounter both essential and toxic metals in their habitat and must allow adequate  
291 uptake of necessary micronutrients while secreting/sequestering excess amounts of micronutrients and  
292 toxic metals. *C. elegans* lacks the MTF-1 protein that regulates metal responsive transcription in many  
293 animals. Instead, it utilizes the Nuclear Hormone Receptor HIZR-1 to control the response to excess  
294 zinc (20). Here, we show that the *C. elegans* Mediator subunit MDT-15 interacts physically and  
295 functionally with HIZR-1, that loss of *mdt-15* alters storage of excess zinc *in vivo*, and that *mdt-15*  
296 mutants are hypersensitive to zinc and cadmium. Moreover, mammalian MED15 is recruited to  
297 regulatory elements of metal-responsive genes in metal-stimulated fashion, and MED15 depletion  
298 blocks the induction of a cadmium responsive gene in lung adenocarcinoma cells. Thus, the HZA  
299 element, HIZR-1 transcription factor, and MDT-15 coregulator compose a regulatory mechanism that  
300 adapts gene expression in response to excess zinc and cadmium to protect the host organism (Fig 6).  
301 This regulatory mechanism represents a new partnership between a *C. elegans* NHR and the  
302 coregulator MDT-15 that regulates one particular adaptive response, that to excess heavy metals.  
303 Moreover, this metal stress response mechanism appears to be at least partly conserved in mammalian  
304 cells (Fig 6).

305

306 **MDT-15 is a coregulator of HIZR-1**

307 Because *C. elegans* appears to lack an MTF-1 ortholog, it has been unclear how it regulates  
308 gene expression in response to changing levels of various metals. We previously showed that the  
309 Mediator subunit *mdt-15* is essential for both zinc and cadmium activated transcription (33), and the  
310 Kornfeld laboratory identified the HZA element and its cognate TF HIZR-1 as regulators of zinc-  
311 inducible transcription (19,20). This raised the hypothesis that these three components might all  
312 cooperate mechanistically; alternatively, they might act in separate molecular pathways. Here, we  
313 provide multiple lines of evidence that HIZR-1 and MDT-15 cooperate mechanistically to induce gene

314 expression in excess zinc and cadmium. First, *mdt-15*, *hizr-1*, and the HZA element are required to  
315 activate the *cdr-1p::gfp* reporter, i.e. they phenocopy (Fig 2; see also (19,20)). Second, MDT-15 and  
316 HIZR-1 physically interact in the yeast-two-hybrid system; notably, this binding can be stimulated by a  
317 known ligand of HIZR-1 (zinc; (20)) and requires a known NHR binding domain of MDT-15 (the KIX-  
318 domain; (34,35); Fig 3). Third, genetic gain of *hizr-1* or *mdt-15* function confers metal homeostasis  
319 gene activation that requires the reciprocal partner (Fig 3). Fourth, loss of *mdt-15* and *hizr-1* causes  
320 similar defects in zinc storage and renders worms hypersensitive to zinc (Fig 4 and (20)). Although we  
321 cannot exclude that the GATA factor ELT-2, which also activates zinc responsive genes including *cdr-*  
322 *1* (Fig 2 and (19)), may interact with MDT-15, we have not observed an interaction between ELT-2 and  
323 MDT-15 in our yeast-two-hybrid assays. Based on our new and published data, we propose a model  
324 whereby elevated levels of zinc or cadmium promote the formation of a HIZR-1–MDT-15 regulatory  
325 complex, which acts through the HZA element to induce the expression of genes required for metal  
326 homeostasis (Fig 6).

327

### 328 **MDT-15 binds HIZR-1 in metal-stimulated fashion**

329 Interestingly, zinc or cadmium supplementation enhanced MDT-15–HIZR-1 binding (Fig 3).  
330 This suggests that, besides promoting HIZR-1 nuclear translocation (20), these metals also modulate  
331 the TF-Mediator interaction, a classical feature of *bona fide* NHR ligands (54). Importantly, two other  
332 HNF4-related NHRs that also bind MDT-15 (34) did not show metal-enhanced binding. This agrees  
333 with the notion that zinc is a specific ligand of HIZR-1 (20) and is not involved in the MDT-15–NHR  
334 interactions through the zinc-containing DBDs of NHRs (21).

335 In the Y2H system, we observed increased binding between HIZR-1 and MDT-15 in the low  
336 micromolar range of zinc and cadmium. Murine ZIP4 undergoes zinc-stimulated endocytosis when  
337 zinc is present in the low micromolar range (55). Similarly, various human and mouse ZIP proteins  
338 promote zinc transport in the low micromolar range (56). Thus, the concentration of zinc required to

339 modulate the HIZR-1–MDT-15 interaction resembles that known to engage other zinc homeostasis  
340 proteins. This argues that the zinc-modulation of the protein interaction we observed in the Y2H system  
341 is likely relevant physiologically.

342 Other physical interactions are likely involved in this zinc homeostasis mechanism, potentially  
343 linking HIZR-1 or MDT-15 to ELT-2 or CDK-8, which we found modestly affects metal regulated  
344 genes (Fig 1). In addition, HNF4-like NHRs form both homo and heterodimers (21). It would be  
345 interesting to examine whether HIZR-1 forms homo- or heterodimers and whether such interactions are  
346 modulated by zinc.

347

#### 348 ***mdt-15* protects worms from excess zinc and cadmium**

349 In the *C. elegans* intestine, zinc is stored in lysosome-related organelles called gut granules. In  
350 excess zinc conditions, gut granules import surplus zinc via the CDF-2 transporter (44), while zinc is  
351 likely also sequestered by MTL-1 and -2. MDT-15 and HIZR-1 promote the induction of these genes  
352 when zinc is in excess. This induction is likely physiologically relevant as mutation of either factor  
353 results in reduced zinc storage in gut granules and reduced organismal metal tolerance (Fig 4 and (20)).

354 The study that established zinc as a direct ligand for HIZR-1 did not test whether this NHR also  
355 bound cadmium (20). Our data suggest that this may be the case, as cadmium stimulates MDT-15–  
356 HIZR-1 binding as strongly as does zinc (Fig 3), and *mdt-15* mutants were sensitive to both metals (Fig  
357 4). However, we note that cadmium could also act indirectly by displacing zinc from other molecular  
358 sites and thus making it available for HIZR-1, resulting in higher available zinc levels that indirectly  
359 engage the MDT-15–HIZR-1 complex. It will be interesting to define whether HIZR-1 is indeed a  
360 direct sensor of the pollutant cadmium.

361 MDT-15 also promotes oxidative stress responses (36,37,42) and it is conceivable that this  
362 function helps protect worms in conditions of excess metals, as e.g. cadmium exposure provokes the  
363 formation of reactive oxygen species (7,49). It will be interesting to determine whether HIZR-1

364 regulates genes other than those involved in storing and mobilizing zinc, such as general or oxidative  
365 stress protective genes.

366

### 367 **Mammalian MED15 also regulates heavy metal stress responsive gene transcription**

368 *C. elegans* MDT-15 plays an important role in many adaptive and stress response pathways. Of  
369 those, its role in regulating lipid metabolism appears to be conserved in yeast and in mammals (43,57),  
370 and its requirement in detoxifying xenobiotic molecules is conserved in fungi (28,58). However,  
371 whether mammalian MED15 proteins regulate stress responses was not known. Studying a lung  
372 adenocarcinoma cell line that responds to cadmium, we found that MED15 depletion compromises the  
373 induction of a metallothionein and that MED15 directly binds the genomic regulatory region of this  
374 gene in cadmium enhanced fashion. Similarly, mouse Med15 showed zinc induced binding to the  
375 regulatory regions of two genes in MIN6 insulinoma cells; although we did not succeed in effectively  
376 depleting Med15 in these cells with transfected siRNAs (not shown), we found that these genes are  
377 induced by zinc. Thus, we speculate that the increased binding of Med15 likely upregulates their  
378 expression in high zinc. In turn, this likely promotes the protection of MIN6 cells from high zinc (Fig  
379 6). A similar mechanism may protect pancreatic islet  $\beta$ -cells from the transiently high zinc levels these  
380 cell experience during insulin exocytosis (52,53).

381 Currently, we do not know what transcription factor cooperates with mammalian MED15  
382 proteins in metal responsive gene expression. MTF-1 induces cadmium responsive genes in mammals  
383 and interacts with Mediator (17), although it is not known which, if any, Mediator subunit directly  
384 targets MTF-1. *C. elegans* HIZR-1 is by sequence most closely related to mammalian HNF4 $\alpha$ , but  
385 functionally and structurally may also resemble mammalian PPAR $\alpha$  (21,59). In mouse livers, exposure  
386 to the PPAR $\alpha$  agonist Wy-14,643 induces *Mt1* and *Mt2* mRNA levels; however, induction is modest  
387 (approximately 1.8 fold) and delayed (after 72 hours) (60). Thus, this may well represent an indirect



388 regulatory effect. Additional work is required to determine the mechanisms by which Mediator, and  
389 potentially MED15, regulate gene expression in response to high concentrations of metals in  
390 mammalian cells and tissues.

391 In sum, our work highlights the HZA–HIZR-1–MDT-15 regulatory mechanism as a critical  
392 transcriptional adaptive mechanism to excess zinc and cadmium in *C. elegans*, with a potentially  
393 conserved role for mammalian MED15.

394

395 **Materials and Methods**

396 ***C. elegans* transcriptome analysis by microarrays**

397 Microarray transcriptome analysis of the *cdk-8(tm1238)* mutant has been described previously  
398 (61). The transcriptome analysis of the *mdt-15(tm2182)* mutant was identical to the analysis of the *cdk-*  
399 *8(tm1238)* mutant using Agilent one-color arrays. We identified a total of 1896 spots with an adjusted  
400 P-value of 0.05 or less and a fold-change of >2, representing 798 downregulated and 422 upregulated  
401 genes. Microarray data have been deposited in Gene Expression Omnibus. Transcriptome profiles of  
402 wild-type worms exposed to 100 $\mu$ M cadmium have been described (62). We determined the overlaps  
403 between these datasets and calculated the significance of the overlap as described (36).

404

405 ***C. elegans* strains and growth conditions**

406 *C. elegans* strains were cultured using standard techniques as described (63) at 20°C; all strains  
407 used here are listed in Table S1. Nematode growth medium (NGM)-lite (0.2% NaCl, 0.4% tryptone,  
408 0.3% KH<sub>2</sub>PO<sub>4</sub>, 0.05% K<sub>2</sub>HPO<sub>4</sub>) agar plates, supplemented with 5 $\mu$ g/mL cholesterol, were used unless  
409 otherwise indicated. *Escherichia coli* OP50 was the food source, except for RNAi, for which we used  
410 HT115. Zinc (ZnSO<sub>4</sub>) and cadmium (CdCl<sub>2</sub>) were supplemented in noble agar minimal media  
411 (NAMM; (44)) and NGM-lite plates, respectively, at indicated concentrations. For qPCR and  
412 phenotype analysis, we synchronized worms by standard sodium hypochlorite treatment and starvation  
413 of isolated eggs on unseeded NGM-lite plates; the next day, synchronized L1 larvae were collected,  
414 placed on seeded plates at the desired densities, and grown until being harvested at the desired  
415 developmental stage, as indicated.

416

417 **Gene knockdown by feeding RNAi in *C. elegans***

418 Knockdown by feeding RNAi was carried out on NGM-lite plates with 25 $\mu$ g/mL carbenicillin,  
419 1mM IPTG, and 12.5 $\mu$ g/mL tetracycline, and seeded twice with the appropriate HT115 RNAi bacteria

420 clone from the Ahringer library (Source BioScience 3318\_Cel\_RNAi\_complete). RNAi clones were  
421 Sanger sequenced to confirm insert identity. RNAi negative control was empty vector L4440. RNAi  
422 clones are listed in Table S2.

423

#### 424 **RNA isolation and quantitative real-time PCR analysis**

425 For *C. elegans*, RNA was extracted from developmentally synchronized worms and prepared  
426 for gene expression analysis by real-time PCR analysis as described (61). In all samples, we  
427 normalized the expression of the tested genes to the average of three normalization genes: *act-1*, *tba-1*,  
428 and *ubc-2*. For A549 cells, RNA was extracted with RNeasy Mini Kit (Qiagen #74106) according to  
429 the manufacturer's protocol and converted into cDNA for gene expression analysis by real-time PCR  
430 analysis as described (Grants et al. 2016). The expression of the tested genes was normalized to the  
431 average of three normalization genes: 18S rRNA, GAPDH, and GUSB. We used t-tests (two-tailed,  
432 equal variance) or nonparametric tests to calculate the significance of expression changes between  
433 conditions, as indicated. Statistical tests were performed based on recommendations by GraphPad  
434 Prism 7. qPCR primers were designed with Primer3web (64) and tested on serial cDNA dilutions, as  
435 described (61). Primer sequences are listed in Table S3.

436

#### 437 **Analysis of the *C. elegans cdr-1* promoter and construction of the *cdr-1p::gfp* promoter** 438 **reporter**

439 Sequences of regulatory elements involved in the zinc, cadmium, or other detoxification/stress  
440 responses were identified from the literature, including ARE, MRE, HSE, DBE, HZA, GATA, and  
441 TATA box elements (19,65-74). If available, the equivalent *C. elegans* consensus sequence for each  
442 regulatory element was identified in the literature, otherwise the eukaryotic consensus sequence was  
443 used. The *cdr-1* promoter (-2853 nucleotides upstream from the predicted transcriptional starting site)  
444 was then searched for presence of these candidate elements using SerialCloner 2.5.

445 The *cdr-1p::gfp* reporter was generated by PCR amplification of the genomic region from 2853  
446 base pairs upstream to 11 base pairs downstream of the *cdr-1* start codon (a G>C mutation at the +3  
447 nucleotide was introduced in the reverse primer to mutate the *cdr-1* start codon) using the primers  
448 gtcgacTTTGACGATGACAGAAGAAATG and ggatccTGAATCCAAGATACTTGAGACAGT,  
449 followed by BamH1-SalI cloning into pPD95.77 GFP (Addgene #1495) to generate SPD771 (*cdr-1p-*  
450 *pPD95.77*). Mutant transgenes were generated by site-directed mutagenesis of SPD771 using the Q5  
451 Site-Directed Mutagenesis kit (NEB E0554S) and primers *cdr-1p\_delGATA1F*  
452 (*CCCTACTTTCccgctgCATTATGTCATCGGG*) and *cdr-1p\_delGATA1R*  
453 (*GTTTCTGTTTCAATTGCAGAATAC*) to generate SPD803 (*cdr-1p-pPD95.77\_DEL\_GATA1*); *cdr-*  
454 *1p\_delGATA2F* (*CCCTACTTTCccgctgCATTATGTCATCGGG*) and *cdr-1p\_delGATA2R*  
455 (*AGAACTGTGTTTTGTGATAAAAATTATTG*) to generate SPD804 (*cdr-1p-*  
456 *pPD95.77\_DEL\_GATA2*); *fwd\_cdr-1p\_delHZA* (*tcgtggcAATTTTATCACAAAACACAGTTC*) and  
457 *fwd\_cdr-1p\_delHZA* (*ccctcaccTCAATTGCAGAATACCATTTG*) to generate SPD884 (*pPD95.77-*  
458 *cdr-1PmutHZA*); and *fwd\_cdr-1p\_delDAF16* (*ccgtCCAGAAAGCTTAAAATTCAAG*) and */rev\_cdr-*  
459 *1p\_delDAF16* (*gtggAACGGAAAAATATAATATGTATATACAC*) to generate SPD879 (*pPD95.77-*  
460 *cdr-1PΔDBE*). All plasmids were verified by Sanger sequencing. Transgenic strains were generated by  
461 injecting a mixture of 50ng/μl GFP reporter plasmid, 5 ng/μl pCFJ90[*myo-2p::mCherry*], and 95 ng/μl  
462 pPD95.77 empty vector into wild-type worms, and then selecting transgenic mCherry-positive progeny.

463

#### 464 **Staining of *C. elegans* gut granules with FluoZin-3**

465 FluoZin-3 acetoxymethyl ester (Molecular Probes F24195) was reconstituted in  
466 dimethylsulfoxide (DMSO) to a 1mM stock solution. FluoZin-3 was diluted in M9 to generate a  
467 concentration of 30μM and dispensed on NAMM plates, as described (44). Synchronized wild-type and  
468 mutant L4 stage worms were transferred from NGM-lite plates to these plates and cultured for 16 hrs.

469 Worms were then transferred to NGM-lite plates without FluoZin-3 for 30 min to reduce excess  
470 FluoZin-3 signal from the intestinal lumen before imaging.

471

### 472 **Fluorescence microscopy on *C. elegans***

473 For imaging, worms were transferred onto 2% (w/v) agarose pads containing 15 $\mu$ M sodium  
474 azide (NaN<sub>3</sub>). For the analysis of worms bearing the *cdr-1p::gfp* reporter, the worms were imaged  
475 using differential interference contrast (DIC) and fluorescence optics through an HQ camera  
476 (Photometrics, Tucson, AZ, USA) on a Zeiss Axioplan 2 microscope (Carl Zeiss Microscopy,  
477 Thornwood, NY, USA). Analysis of fluorescence intensity was performed using ImageJ software,  
478 normalizing for area and background fluorescence.

479 For analysis of FluoZin-3 stained worms, we used a Leica SP8 confocal microscope with Leica  
480 LAS X software. Images of worms with different genotypes were taken with the same exposure times.  
481 To assess zinc storage, we quantified the number of FluoZin-3 stained granules in the first six cells of  
482 the gut with ImageJ2 (75). To eliminate non-specific fluorescence, we manually removed background  
483 signal outside of the gut cells and in the gut lumen. Background fluorescence in the remaining part of  
484 the image was then subtracted equally from all images, and images were smoothed with the “Sigma  
485 Filter Plus” (edge-preserving noise reduction) function. Images were simultaneously adjusted with  
486 Auto threshold of “MaxEntropy” and Auto local threshold of the mean. After adjusting the threshold  
487 and reducing background noise, granules were counted automatically with the “3D Objects Counter”  
488 function. To verify the automatic count, we manually counted the number of granules in randomly  
489 sampled images.

490

### 491 ***C. elegans* egg laying assay**

492 N2 and *mdt-15(tm2182)* worms were grown from late L4 stage for 24 hours on agar A plates  
493 seeded with OP50 and supplemented with 100 $\mu$ M zinc. Eggs and L1 progeny were counted after that  
494 time and compared to worms grown on agar A plats with no additional treatment.

495

#### 496 **Yeast-two-hybrid assays and Western blots**

497 MDT-15 bait plasmids and NHR-49 and SKN-1c prey plasmids have been described (42). The  
498 wild-type HIZR-1 cDNA sequence was amplified with the primers fwd\_BamHI\_NHR-33\_preY2H  
499 (ggatccATGCAAAAAGTTATGAATGATCCTG) and rev\_XhoI\_NHR-33\_preY2H  
500 (ctcgagATCATTTCGTATGAACAATGCAC), and cloned into the BamH1 and SalI sites of  
501 pGADnewMCS to generate SPD885 (pGADnewMCS\_NHR-33). We then used the NEB Q5 site-  
502 directed mutagenesis kit (E0554S), template SPD885, and primers SDM\_nhr-33-am285\_F  
503 (AGCAGAAaATGCTGCAAAAAT) and SDM\_nhr-33-am285\_R (GATTGTACACCCTCTGCATTC)  
504 to generate SPD918 (pGADnewMCS\_NHR-33\_am285). All plasmids were sequenced to verify the  
505 accuracy of the sequence amplified by PCR and the absence of other mutations. Pairs of plasmids were  
506 transformed into strain Y187 (Clontech, Mountain View, CA, USA) and liquid  $\beta$ -galactosidase assays  
507 were performed using an OMEGASTAR plate reader (BMG Labtech, Ortenberg, Germany), as  
508 described (42). Each assay included at least three technical replicates and was repeated three or more  
509 times. Yeast lysis, SDS-PAGE, and Western blots to detect protein expression were done as described  
510 (42). Antibodies used were GAL4 AD Mouse Monoclonal Antibody (Takara Bio USA, Inc. #630402),  
511 GAL4 DNA-BD Mouse Monoclonal Antibody (Takara Bio USA, Inc. #630403), and GAPDH Mouse  
512 Monoclonal Antibody (CB1001-500UG 6C5) for normalization.

513

#### 514 **Mammalian cell culture and transfection**

515 A549 lung adenocarcinoma cells were obtained from ATCC and maintained in Dulbecco's  
516 Modified Eagle Medium (DMEM; Gibco #11995065) supplemented with 10% fetal bovine serum

517 (FBS; Gibco #12484028), as described (51). The cells were seeded at a density of  $5 \times 10^4$  cells per well  
518 in 24-well plates 24 hours before transfection. On the day of transfection, scrambled (Dharmacon #D-  
519 001206-13-05) and MED15 specific (Dharmacon #M-017015-02-0005) siRNAs were delivered into  
520 A549 cells using DharmaFECT 1 Transfection Reagent (Dharmacon #T-2001-03) according to the  
521 manufacturer's protocol. The transfection medium was replaced with complete medium after 24 hours,  
522 and the cells were treated with  $5 \mu\text{M}$   $\text{CdCl}_2$  for hours 48 hours post-transfection. MIN6 cells were  
523 cultured in 25mM glucose DMEM, as described (76), and zinc stimulation was performed by addition  
524 of  $50 \mu\text{M}$   $\text{ZnSO}_4$  for 24 hours.

525

#### 526 **ChIP in A549 and MIN6 cells**

527 ChIP was performed as described (77) in A549 and MIN6 cells with minor modifications.  
528 Briefly, cells were grown for 24 hours with or without  $50 \mu\text{M}$   $\text{CdCl}_2$  and  $100 \mu\text{M}$   $\text{ZnSO}_4$  (respectively)  
529 to  $2 \times 10^7$  cells per plate, and crosslinked by adding paraformaldehyde to a final concentration of 3% for  
530 10 minutes at room temperature. Immunoprecipitation was performed using MED15 antibody  
531 (ProteinTech, 11566-1-AP). Crosslinking was then reversed by overnight incubation at  $65^\circ\text{C}$  and DNA  
532 purified using QIAquick PCR purification column (Qiagen, 28104). Immunoprecipitated DNA was  
533 then quantified via Qubit (ThermoFisher, Q32854) and analyzed by qPCR for appropriate genomic  
534 regulatory loci and controls. Primer sequences are listed in Table S3.

535

536 **Acknowledgements**

537 We thank the Taubert lab and Dr. Frédéric Picard (Université Laval) for comments on the  
538 manuscript. Some strains were provided by the CGC, which is funded by NIH Office of Research  
539 Infrastructure Programs (P40 OD010440). We thank Rocky Shi (BCCHR) for helping us develop the  
540 script to quantify gut granule number in the *C. elegans* intestine. Grant support was from The Canadian  
541 Institutes of Health Research (CIHR; PJT-153199 to ST), the Natural Sciences and Engineering  
542 Research Council of Canada (NSERC; RGPIN-2018-05133 to ST), the Cancer Research Society (CRS;  
543 to ST), and Diabetes Canada (OG-3-15-4946-FL to FL and ST). NS was supported by NSERC CGS-M  
544 and UBC Medical Genetics scholarships, AZK by a BCCHR Canucks for Kids Diabetes laboratory  
545 scholarship, JMG by a Vanier Canada Graduate Scholarship, MYYL by a BCCHR summer  
546 studentship, AM by an NSERC-USRA studentship, and ST by a Canada Research Chair. No author has  
547 any conflict of interest.

548



549 **References**

- 550 1. Hambidge KM, Miller LV, Westcott JE, Sheng X, Krebs NF. Zinc bioavailability and  
551 homeostasis. *Am J Clin Nutr.* 2010 May;91(5):1478S–1483S.
- 552 2. Vallee BL, Falchuk KH. The biochemical basis of zinc physiology. *Physiol Rev.* 1993  
553 Jan;73(1):79–118.
- 554 3. Murakami M, Hirano T. Intracellular zinc homeostasis and zinc signaling. *Cancer Sci.* 2008  
555 Aug;99(8):1515–22.
- 556 4. Andreini C, Banci L, Bertini I, Rosato A. Zinc through the three domains of life. *J*  
557 *Proteome Res.* 2006 Nov;5(11):3173–8.
- 558 5. Fukada T, Yamasaki S, Nishida K, Murakami M, Hirano T. Zinc homeostasis and signaling  
559 in health and diseases: Zinc signaling. *J Biol Inorg Chem.* 2011 Oct;16(7):1123–34.
- 560 6. Plum LM, Rink L, Haase H. The essential toxin: impact of zinc on human health. *Int J*  
561 *Environ Res Public Health.* 2010 Apr;7(4):1342–65.
- 562 7. Thévenod F, Lee W-K. Cadmium and cellular signaling cascades: interactions between cell  
563 death and survival pathways. *Arch Toxicol.* 2013 Oct;87(10):1743–86.
- 564 8. Joseph P. Mechanisms of cadmium carcinogenesis. *Toxicol Appl Pharmacol.* 2009 Aug  
565 1;238(3):272–9.
- 566 9. Maret W. The Metals in the Biological Periodic System of the Elements: Concepts and  
567 Conjectures. *Int J Mol Sci.* 2016 Jan 5;17(1).
- 568 10. Dong J, Song MO, Freedman JH. Identification and characterization of a family of  
569 *Caenorhabditis elegans* genes that is homologous to the cadmium-responsive gene *cdr-1*.  
570 *Biochim Biophys Acta.* 2005 Jan 21;1727(1):16–26.
- 571 11. Brzóska MM, Moniuszko-Jakoniuk J. Interactions between cadmium and zinc in the  
572 organism. *Food Chem Toxicol.* 2001 Oct;39(10):967–80.
- 573 12. Park C, Jeong J. Synergistic cellular responses to heavy metal exposure: A minireview.  
574 *Biochim Biophys Acta.* 2018 Jul;1862(7):1584–91.
- 575 13. Dietrich N, Tan C-H, Cubillas C, Earley BJ, Kornfeld K. Insights into zinc and cadmium  
576 biology in the nematode *Caenorhabditis elegans*. *Arch Biochem Biophys.* 2016 Dec  
577 1;611:120–33.
- 578 14. Chabosseau P, Rutter GA. Zinc and diabetes. *Arch Biochem Biophys.* 2016 Dec 1;611:79–  
579 85.
- 580 15. Ehrensberger KM, Bird AJ. Hammering out details: regulating metal levels in eukaryotes.  
581 *Trends Biochem Sci.* 2011 Oct;36(10):524–31.
- 582 16. Choi S, Bird AJ. Zinc'ing sensibly: controlling zinc homeostasis at the transcriptional level.  
583 *Metallomics.* 2014 Jul;6(7):1198–215.

- 584 17. Günther V, Lindert U, Schaffner W. The taste of heavy metals: gene regulation by MTF-1.  
585 Biochim Biophys Acta. 2012 Sep;1823(9):1416–25.
- 586 18. Coneyworth LJ, Jackson KA, Tyson J, Bosomworth HJ, van der Hagen E, Hann GM, et al.  
587 Identification of the human zinc transcriptional regulatory element (ZTRE): a palindromic  
588 protein-binding DNA sequence responsible for zinc-induced transcriptional repression. J  
589 Biol Chem. 2012 Oct 19;287(43):36567–81.
- 590 19. Roh HC, Dimitrov I, Deshmukh K, Zhao G, Warnhoff K, Cabrera D, et al. A modular  
591 system of DNA enhancer elements mediates tissue-specific activation of transcription by  
592 high dietary zinc in *C. elegans*. Nucleic Acids Res. 2015 Jan;43(2):803–16.
- 593 20. Warnhoff K, Roh HC, Kocsisova Z, Tan C-H, Morrison A, Crosswell D, et al. The Nuclear  
594 Receptor HIZR-1 Uses Zinc as a Ligand to Mediate Homeostasis in Response to High Zinc.  
595 Sengupta P, Tissenbaum H, editors. PLoS Biol. Public Library of Science; 2017  
596 Jan;15(1):e2000094.
- 597 21. Taubert S, Ward JD, Yamamoto KR. Nuclear hormone receptors in nematodes: evolution  
598 and function. Mol Cell Endocrinol. 2011 Mar 1;334(1-2):49–55.
- 599 22. O'Malley BW, Qin J, Lanz RB. Cracking the coregulator codes. Current Opinion in Cell  
600 Biology. 2008 Jun;20(3):310–5.
- 601 23. Spiegelman BM, Heinrich R. Biological control through regulated transcriptional  
602 coactivators. Cell. 2004 Oct 15;119(2):157–67.
- 603 24. Vihervaara A, Duarte FM, Lis JT. Molecular mechanisms driving transcriptional stress  
604 responses. Nat Rev Genet. 2018 Jun;19(6):385–97.
- 605 25. Allen BL, Taatjes DJ. The Mediator complex: a central integrator of transcription. Nat Rev  
606 Mol Cell Biol. 2015 Mar;16(3):155–66.
- 607 26. Grants JM, Goh GYS, Taubert S. The Mediator complex of *Caenorhabditis elegans*:  
608 insights into the developmental and physiological roles of a conserved transcriptional  
609 coregulator. Nucleic Acids Res. 2015 Feb 27;43(4):2442–53.
- 610 27. Naar AM, Thakur JK. Nuclear receptor-like transcription factors in fungi. Genes Dev. 2009  
611 Feb 15;23(4):419–32.
- 612 28. Nishikawa JL, Boeszoermyeni A, Vale-Silva LA, Torelli R, Posteraro B, Sohn Y-J, et al.  
613 Inhibiting fungal multidrug resistance by disrupting an activator-Mediator interaction.  
614 Nature. 2016 Feb 25;530(7591):485–9.
- 615 29. Fant CB, Taatjes DJ. Regulatory functions of the Mediator kinases CDK8 and CDK19.  
616 transcription. 2018 Dec 26;153(6):1–15.
- 617 30. Galbraith MD, Allen MA, Bensard CL, Wang X, Schwinn MK, Qin B, et al. HIF1A  
618 employs CDK8-mediator to stimulate RNAPII elongation in response to hypoxia. Cell.  
619 2013 Jun 6;153(6):1327–39.

- 620 31. Bose S, Dutko JA, Zitomer RS. Genetic factors that regulate the attenuation of the general  
621 stress response of yeast. *Genetics*. 2005 Mar;169(3):1215–26.
- 622 32. Marr MT, Isogai Y, Wright KJ, Tjian R. Coactivator cross-talk specifies transcriptional  
623 output. *Genes Dev*. 2006 Jun 1;20(11):1458–69.
- 624 33. Taubert S, Hansen M, Van Gilst MR, Cooper SB, Yamamoto KR. The Mediator subunit  
625 MDT-15 confers metabolic adaptation to ingested material. *PLoS Genet*. 2008  
626 Feb;4(2):e1000021.
- 627 34. Taubert S, Van Gilst MR, Hansen M, Yamamoto KR. A Mediator subunit, MDT-15,  
628 integrates regulation of fatty acid metabolism by NHR-49-dependent and -independent  
629 pathways in *C. elegans*. *Genes Dev*. 2006 May 1;20(9):1137–49.
- 630 35. Arda HE, Taubert S, Macneil LT, Conine CC, Tsuda B, Van Gilst M, et al. Functional  
631 modularity of nuclear hormone receptors in a *Caenorhabditis elegans* metabolic gene  
632 regulatory network. *Molecular Systems Biology*. 2010 May 11;6:367.
- 633 36. Goh GYS, Winter JJ, Bhanshali F, Doering KRS, Lai R, Lee K, et al. NHR-49/HNF4  
634 integrates regulation of fatty acid metabolism with a protective transcriptional response to  
635 oxidative stress and fasting. *Aging Cell*. 2018 Jun;17(3):e12743.
- 636 37. Hu Q, D'Amora DR, Macneil LT, Walhout AJM, Hu Q. The *Caenorhabditis elegans*  
637 Oxidative Stress Response Requires the NHR-49 Transcription Factor. *G3 (Bethesda)*. 2018  
638 Dec 10;8(12):3857–63.
- 639 38. Liao VH-C, Dong J, Freedman JH. Molecular characterization of a novel, cadmium-  
640 inducible gene from the nematode *Caenorhabditis elegans*. A new gene that contributes to  
641 the resistance to cadmium toxicity. *J Biol Chem*. 2002 Nov 1;277(44):42049–59.
- 642 39. Kormish JD, Gaudet J, Mcghee JD. Development of the *C. elegans* digestive tract. *Current*  
643 *Opinion in Genetics & Development*. 2010 Aug;20(4):346–54.
- 644 40. Svensk E, Ståhlman M, Andersson C-H, Johansson M, Borén J, Pilon M. PAQR-2  
645 Regulates Fatty Acid Desaturation during Cold Adaptation in *C. elegans*. *PLoS Genet*. 2013  
646 Sep;9(9):e1003801.
- 647 41. Lee D, An S, Jung Y, Yamaoka Y, Ryu Y, Goh G, et al. *C. elegans* Mediator 15 permits  
648 low temperature-induced longevity via regulation of lipid and protein homeostasis.  
649 biorxivorg.
- 650 42. Goh GYS, Martelli KL, Parhar KS, Kwong AWL, Wong MA, Mah A, et al. The conserved  
651 Mediator subunit MDT-15 is required for oxidative stress responses in *Caenorhabditis*  
652 *elegans*. *Aging Cell*. 2014 Feb;13(1):70–9.
- 653 43. Yang F, Vought BW, Satterlee JS, Walker AK, Jim Sun Z-Y, Watts JL, et al. An  
654 ARC/Mediator subunit required for SREBP control of cholesterol and lipid homeostasis.  
655 *Nature*. 2006 Aug 10;442(7103):700–4.

- 656 44. Roh HC, Collier S, Guthrie J, Robertson JD, Kornfeld K. Lysosome-related organelles in  
657 intestinal cells are a zinc storage site in *C. elegans*. *Cell Metabolism*. 2012 Jan 4;15(1):88–  
658 99.
- 659 45. Lee D, Jeong D-E, Son HG, Yamaoka Y, Kim H, Seo K, et al. SREBP and MDT-15 protect  
660 *C. elegans* from glucose-induced accelerated aging by preventing accumulation of saturated  
661 fat. *Genes Dev*. 2015 Dec 1;29(23):2490–503.
- 662 46. Hou NS, Gutschmidt A, Choi DY, Pather K, Shi X, Watts JL, et al. Activation of the  
663 endoplasmic reticulum unfolded protein response by lipid disequilibrium without disturbed  
664 proteostasis in vivo. *Proc Natl Acad Sci USA*. 2014 Jun 3;111(22):E2271–80.
- 665 47. Brock TJ, Browse J, Watts JL. Genetic regulation of unsaturated fatty acid composition in  
666 *C. elegans*. *PLoS Genet*. 2006 Jul;2(7):e108.
- 667 48. Bourbon H-M, Aguilera A, Ansari AZ, Asturias FJ, Berk AJ, Björklund S, et al. A unified  
668 nomenclature for protein subunits of mediator complexes linking transcriptional regulators  
669 to RNA polymerase II. *Molecular Cell*. 2004 Jun 4;14(5):553–7.
- 670 49. IARC Working Group on the Evaluation of Carcinogenic Risks to Humans. Arsenic,  
671 metals, fibres, and dusts. *IARC Monogr Eval Carcinog Risks Hum*. 2012;100(Pt C):11–  
672 465.
- 673 50. Beveridge R, Pintos J, Parent M-É, Asselin J, Siemiatycki J. Lung cancer risk associated  
674 with occupational exposure to nickel, chromium VI, and cadmium in two population-based  
675 case-control studies in Montreal. *Am J Ind Med*. 2010 May;53(5):476–85.
- 676 51. Zhao W-J, Zhang Z-J, Zhu Z-Y, Song Q, Zheng W-J, Hu X, et al. Time-dependent response  
677 of A549 cells upon exposure to cadmium. *J Appl Toxicol*. 2018 Jul 26;:1–10.
- 678 52. Rutter GA, Chabosseau P, Bellomo EA, Maret W, Mitchell RK, Hodson DJ, et al.  
679 Intracellular zinc in insulin secretion and action: a determinant of diabetes risk? *Proc Nutr*  
680 *Soc*. 2016 Feb;75(1):61–72.
- 681 53. Li YV. Zinc and insulin in pancreatic beta-cells. *Endocrine*. 2014 Mar;45(2):178–89.
- 682 54. Chen W, Roeder RG. Mediator-dependent nuclear receptor function. *Seminars in Cell and*  
683 *Developmental Biology*. 2011 Sep;22(7):749–58.
- 684 55. Mao X, Kim B-E, Wang F, Eide DJ, Petris MJ. A histidine-rich cluster mediates the  
685 ubiquitination and degradation of the human zinc transporter, hZIP4, and protects against  
686 zinc cytotoxicity. *J Biol Chem. American Society for Biochemistry and Molecular Biology*;  
687 2007 Mar 9;282(10):6992–7000.
- 688 56. Bafaro E, Liu Y, Xu Y, Dempski RE. The emerging role of zinc transporters in cellular  
689 homeostasis and cancer. *Signal Transduct Target Ther*. 2017;2:17029.
- 690 57. Thakur JK, Arthanari H, Yang F, Chau KH, Wagner G, Näär AM. Mediator subunit  
691 Gal11p/MED15 is required for fatty acid-dependent gene activation by yeast transcription  
692 factor Oaf1p. *J Biol Chem*. 2009 Feb 13;284(7):4422–8.

- 693 58. Thakur JK, Arthanari H, Yang F, Pan S-J, Fan X, Breger J, et al. A nuclear receptor-like  
694 pathway regulating multidrug resistance in fungi. *Nature*. 2008 Apr 3;452(7187):604–9.
- 695 59. Lee K, Goh GYS, Wong MA, Klassen TL, Taubert S. Gain-of-Function Alleles in  
696 *Caenorhabditis elegans* Nuclear Hormone Receptor nhr-49 Are Functionally Distinct. *PLoS*  
697 *ONE*. 2016;11(9):e0162708.
- 698 60. Yamazaki K, Kuromitsu J, Tanaka I. Microarray analysis of gene expression changes in  
699 mouse liver induced by peroxisome proliferator- activated receptor alpha agonists. *Biochem*  
700 *Biophys Res Commun*. 2002 Jan 25;290(3):1114–22.
- 701 61. Grants JM, Ying LTL, Yoda A, You CC, Okano H, Sawa H, et al. The Mediator Kinase  
702 Module Restrains Epidermal Growth Factor Receptor Signaling and Represses Vulval Cell  
703 Fate Specification in *Caenorhabditis elegans*. *Genetics*. *Genetics*; 2016 Feb;202(2):583–99.
- 704 62. Cui Y, McBride SJ, Boyd WA, Alper S, Freedman JH. Toxicogenomic analysis of  
705 *Caenorhabditis elegans* reveals novel genes and pathways involved in the resistance to  
706 cadmium toxicity. *Genome Biol. BioMed Central Ltd*; 2007;8(6):R122.
- 707 63. Brenner S. The genetics of *Caenorhabditis elegans*. *Genetics*. 1974 May;77(1):71–94.
- 708 64. Untergasser A, Cutcutache I, Koressaar T, Ye J, Faircloth BC, Remm M, et al. Primer3--  
709 new capabilities and interfaces. *Nucleic Acids Res*. 2012 Aug;40(15):e115–5.
- 710 65. Stuart GW, Searle PF, Chen HY, Brinster RL, Palmiter RD. A 12-base-pair DNA motif that  
711 is repeated several times in metallothionein gene promoters confers metal regulation to a  
712 heterologous gene. *Proceedings of the National Academy of Sciences*. 1984  
713 Dec;81(23):7318–22.
- 714 66. Sorger PK. Heat shock factor and the heat shock response. *Cell*. 1991 May 3;65(3):363–6.
- 715 67. Blackwell TK, Bowerman B, Priess JR, Weintraub H. Formation of a monomeric DNA  
716 binding domain by Skn-1 bZIP and homeodomain elements. *Science*. 1994 Oct  
717 28;266(5185):621–8.
- 718 68. Chen X, Chu M, Giedroc DP. MRE-Binding transcription factor-1: weak zinc-binding  
719 finger domains 5 and 6 modulate the structure, affinity, and specificity of the metal-  
720 response element complex. *Biochemistry*. 1999 Sep 28;38(39):12915–25.
- 721 69. Furuyama T, Nakazawa T, Nakano I, Mori N. Identification of the differential distribution  
722 patterns of mRNAs and consensus binding sequences for mouse DAF-16 homologues.  
723 *Biochem J. Portland Press Ltd*; 2000 Jul 15;349(Pt 2):629–34.
- 724 70. Smale ST, Kadonaga JT. The RNA polymerase II core promoter. *Annu Rev Biochem*.  
725 2003;72:449–79.
- 726 71. An JH, Blackwell TK. SKN-1 links *C. elegans* mesendodermal specification to a conserved  
727 oxidative stress response. *Genes Dev*. 2003 Aug 1;17(15):1882–93.

- 728 72. Shen C, Nettleton D, Jiang M, Kim SK, Powell-Coffman JA. Roles of the HIF-1 hypoxia-  
729 inducible factor during hypoxia response in *Caenorhabditis elegans*. *J Biol Chem*. 2005  
730 May 27;280(21):20580–8.
- 731 73. Mcghee JD, Sleumer MC, Bilenky M, Wong K, McKay SJ, Goszczynski B, et al. The ELT-  
732 2 GATA-factor and the global regulation of transcription in the *C. elegans* intestine. *Dev*  
733 *Biol*. 2007 Feb 15;302(2):627–45.
- 734 74. Chiang W-C, Ching T-T, Lee HC, Mousigian C, Hsu A-L. HSF-1 regulators DDL-1/2 link  
735 insulin-like signaling to heat-shock responses and modulation of longevity. *Cell*. 2012 Jan  
736 20;148(1-2):322–34.
- 737 75. Rueden CT, Schindelin J, Hiner MC, DeZonia BE, Walter AE, Arena ET, et al. ImageJ2:  
738 ImageJ for the next generation of scientific image data. *BMC Bioinformatics*. 2017 Nov  
739 29;18(1):529.
- 740 76. Sabatini PV, Speckmann T, Nian C, Glavas MM, Wong CK, Yoon JS, et al. Neuronal PAS  
741 Domain Protein 4 Suppression of Oxygen Sensing Optimizes Metabolism during Excitation  
742 of Neuroendocrine Cells. *Cell Rep*. 2018 Jan 2;22(1):163–74.
- 743 77. Johnson DS, Mortazavi A, Myers RM, Wold B. Genome-wide mapping of in vivo protein-  
744 DNA interactions. *Science*. 2007 Jun 8;316(5830):1497–502.
- 745
- 746

747 **Supporting Information**

748 Table S1: List of worm strains.

749 Table S2: List of HT115 RNAi bacteria clones from the Ahringer library.

750 Table S3: List of primers used in qPCR experiments.

751 Figure S1: The *cdr-1p::gfp* transcriptional reporter is induced by 100 $\mu$ M cadmium and 200 $\mu$ M  
752 zinc, and induction in adult worms by cadmium requires *elt-2*.

753 Figure S2: MDT-15 and HIZR-1 interact physically.

754 Figure S3: *mdt-15(tm2182)* and *hizr-1(am286)* mutants have a zinc storage defect.

755 Figure S4: Expression analysis of fusion proteins for Y2H assays.

756

757 **Figure legends**

758 **Figure 1: Mediator subunits *mdt-15* and *cdk-8* are required for heavy metal stress**

759 **responses.** [A] The Venn diagram depicts the overlap between genes downregulated in the *mdt-*  
760 *15(tm2182)* mutant and genes induced by cadmium (from (62)). Statistical significance was assessed by  
761 Fisher's exact test. [B] The Venn diagram depicts the overlap between genes downregulated in the *cdk-*  
762 *8(tm1238)* mutant and genes induced by cadmium. Statistical significance was assessed by Fisher's  
763 exact test. [C-D] qPCR analysis of zinc and cadmium-responsive genes in wild-type (WT) and *cdk-*  
764 *8(tm1238)* mutant worms grown on 100 $\mu$ M cadmium for 4 hours [C] or on 200 $\mu$ M zinc for 16 hours  
765 [D]. Graphs show fold induction, normalized to the average of unsupplemented WT mRNA levels.  
766 Error bars: SEM ( $n=3$ ). Statistical analysis: \*  $p < 0.05$ , unpaired t-test comparing WT supplemented  
767 worms to mutant supplemented worms.

768

769 **Figure 2: The TFs *hizr-1* and *elt-2* and their cognate promoter elements are required for**

770 **heavy metal stress responses.** [A] Illustration of the *cdr-1p::gfp* reporter and putative regulatory DNA  
771 elements in the *cdr-1* promoter; note, the diagram is not to scale. For details, see text. [B] Graphs show  
772 average fluorescence intensity (arbitrary units, A.U.) of worms bearing the *cdr-1p::gfp* transcriptional  
773 reporter in WT and *cdk-8(tm1238)* backgrounds or fed either control or *mdt-15* RNAi and exposed for  
774 four hours to 0 $\mu$ M or 100 $\mu$ M cadmium or 0 $\mu$ M or 200 $\mu$ M zinc, as indicated. Error bars: SEM ( $n > 19$   
775 worms per group). Statistical analysis: \*\*\*\*  $p < 0.0001$ , n.s.= not significant, Two-way ANOVA,  
776 multiple comparisons, Tukey correction; comparisons are to WT or *control(RNAi)* unless indicated. [C]  
777 Graph shows average fluorescence intensity (arbitrary units, A.U.) of worms bearing the *cdr-1p::gfp*  
778 transcriptional reporter before and after a 0 $\mu$ M or 100 $\mu$ M cadmium exposure (four hours), and fed  
779 either control or transcription factor RNAi, as indicated. Error bars: SEM ( $n > 19$  worms per group).  
780 Statistical analysis: \*\*\*\*  $p < 0.0001$ , n.s.= not significant, Two-way ANOVA, multiple comparisons,  
781 Tukey correction; comparisons are to *control(RNAi)* unless indicated. [D] Graph shows average



782 fluorescence intensity (arbitrary units, A.U.) of worms bearing the following *cdr-1p::gfp* reporter  
783 variants: wild-type, WT; mutated HZA element, *cdr-1PΔHZA*; mutated GATA elements, *cdr-*  
784 *1PΔGATA1* or *cdr-1PΔGATA2*. All mutants were assessed with 0μM or 100μM cadmium (four hours).  
785 Error bars: SEM ( $n > 19$  worms per group). Statistical analysis: \*\*\*\*  $p < 0.0001$ , n.s.= not significant,  
786 Two-way ANOVA, multiple comparisons, Tukey correction; comparisons are to WT unless indicated.  
787

788 **Figure 3: MDT-15 and HIZR-1 are co-dependent for metal responsive gene induction and**  
789 **physically bind in zinc-enhanced fashion. [A-B]** qPCR analysis of zinc and cadmium-responsive  
790 genes. The graphs show fold-inductions of mRNAs normalized to the average of wild-type  
791 *control(RNAi)* worms. Error bars: SEM. Statistical analysis: \*  $p < 0.05$ , \*\*  $p < 0.01$ , unpaired  
792 Student's t-test for indicated comparisons. [A] Comparison of wild-type and *hizr-1(am285)* worms  
793 grown on control RNAi or *mdt-15* RNAi ( $n=5$ ). [B] Comparison of wild-type and *mdt-15(yh8)* worms  
794 grown on control RNAi, *hizr-1* RNAi, or *nhr-49* RNAi ( $n=3$ ). [C-E] Protein-protein interaction  
795 analysis using the Y2H system. Graphs show average interaction strength (arbitrary units, A.U.). Error  
796 bars: SEM. [C] Interaction between MDT-15 and HIZR-1, with Empty Vector (EV)-HIZR-1 and  
797 MDT-15-EV as negative controls, and MDT-15-SKN-1c as a positive control ( $n=3$ ). Statistical  
798 analysis: \*\*\*  $p < 0.001$ , \*\*\*\*  $p < 0.0001$ , One-way ANOVA, multiple comparisons, Dunnett  
799 correction. All comparisons for “MDT-15 + EV” unless indicated. [D] Interaction strength between  
800 MDT-15 and HIZR-1; MDT-15 and NHR-64; and MDT-15 and NHR-49, all with no treatment, or  
801 treated with 200μM zinc, 5μM cadmium, or 200μM manganese ( $n=3$ ). Statistical analysis: \*\*\*\*  $p <$   
802 0.0001, Two-way ANOVA, multiple comparisons, Dunnett correction. All comparisons to the pertinent  
803 “no supplement” control. [E] Interaction between HIZR-1 and MDT-15 or HIZR-1-D270N and MDT-  
804 15 with and without zinc treatment ( $n=4$ ). Statistical analysis: \*\*  $p < 0.01$ , \*\*\*  $p < 0.001$ , One-way  
805 ANOVA, multiple comparisons, Dunnett correction. All comparisons to “HIZR-1” unless indicated.  
806

807 **Figure 4: *mdt-15(tm2182)* mutants have a zinc storage defect and are sensitive to excess**  
808 **heavy metals. [A]** Representative fluorescence images of worms stained with FluoZin-3, showing zinc  
809 accumulation in gut granules in wild-type, *mdt-15(tm2182)*, *cdk-8(tm1238)*, and *hizr-1(am286)* worms  
810 grown with 200 $\mu$ M zinc supplementation. **[B]** Quantification of the number of gut granules in wild-  
811 type (WT), *mdt-15(tm2182)*, and *cdk-8(tm1238)* worms; every dot represents an individual worm. Error  
812 bars: SEM.  $n > 10$  worms per genotype. Statistical analysis: \*\*\*\*  $p < 0.0001$ , One-way ANOVA,  
813 multiple comparisons, Dunnett correction, compared to “WT”. **[C]** Quantification of the number of gut  
814 granules in WT and *hizr-1(am286)* worms; every dot represents an individual worm. Error bars: SEM.  
815  $n > 13$  worms per genotype. Statistical analysis: \*\*\*  $p < 0.001$ , One-way ANOVA, multiple  
816 comparisons, Dunnett correction, compared to “WT”. **[D]** Graphs show the average number of eggs  
817 laid over a 24-hour period by WT worms and *mdt-15(tm2182)* mutants grown on 0 $\mu$ M and 100 $\mu$ M zinc  
818 ( $n > 51$  worms per condition). Error bars: SEM; statistical analysis: \*\*\*\*  $p < 0.0001$  Two-way  
819 ANOVA, multiple comparisons; Tukey correction. **[E]** Graphs show the average number of eggs laid  
820 over a 24-hour period by WT worms and *mdt-15(tm2182)* mutants grown on 0 $\mu$ M and 2.5 $\mu$ M cadmium  
821 ( $n > 23$  worms per condition). Error bars: SEM; statistical analysis: \*\*\*\*  $p < 0.0001$  Two-way  
822 ANOVA, multiple comparisons; Tukey correction.

823

824 **Figure 5. MED15 binds and regulates metal responsive genes in mammalian cells. [A]**  
825 qPCR analysis of cadmium inducible genes in control (scr = scrambled siRNA) and MED15 siRNA  
826 (siMED15) treated A549 cells exposed to 5 $\mu$ M cadmium for four hours. MT1X was not affected in  
827 statistically significant fashion. For MT2A, all comparisons are vs. the untreated scr samples except  
828 where indicated. Error bars: SEM; statistical analysis: \*  $p < 0.05$ , \*\*  $p < 0.01$  Two-way ANOVA,  
829 multiple comparisons, Tukey correction ( $n=3$ ). **[B]** The graph shows relative MED15 occupancy at the  
830 MT1X and MT2A promoters and nearby control regions in A549 cells, as determined by ChIP-qPCR  
831 before and after the addition of 5 $\mu$ M cadmium. Error bars: SEM; statistical analysis: \*\*  $p < 0.01$

832 Student's T-test, multiple comparisons, Holm-Sidak correction (n=3). **[C]** The graph shows qPCR  
833 analysis of MIN6 cells treated without and with 50 $\mu$ M zinc. Error bars: SEM; statistical analysis: \*\*  $p$   
834 < 0.01, \*\*\*  $p$  < 0.001 Student's T-test, multiple comparisons, Holm-Sidak correction (n=4). **[D]** The  
835 graph shows relative Med15 occupancy at the *Mtl* promoter and *Slc30a8* enhancer and nearby control  
836 regions in MIN6 cells as determined by ChIP-qPCR, before and after the addition of 100 $\mu$ M Zn. Error  
837 bars: SEM; statistical analysis: \*  $p$  < 0.05, \*\*\*  $p$  < 0.01 Student's T-test, multiple comparisons, Holm-  
838 Sidak correction (n=3).

839

840 **Figure 6. Model of MDT-15 and MED15 driven gene regulation in response to high metal**  
841 **levels. [A]** In the *C. elegans* intestinal cells, MDT-15 cooperates with HIZR-1 bound to the HZA  
842 element to induce the metal sequestering metallothioneins (*mtl-1* and *-2*) and the transporter *cdf-2*,  
843 which shuttles zinc into storage granules; excess cadmium is likely detoxified through similar  
844 mechanisms. ELT-2 may also contact Mediator to regulate metal responsive transcription. **[B]** In the  
845 mouse pancreatic  $\beta$ -cells, Med15 regulates the expression of genes such as *Slc30a8/ZnT1* in response  
846 to elevated zinc levels, possibly via HNF4, or other, Mediator contacting proteins.

847

A

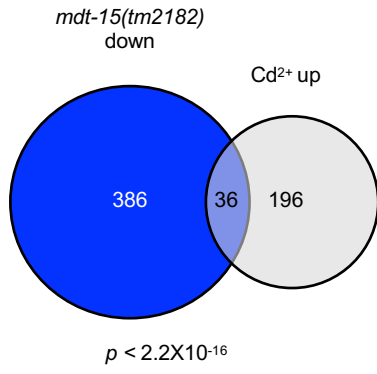

B

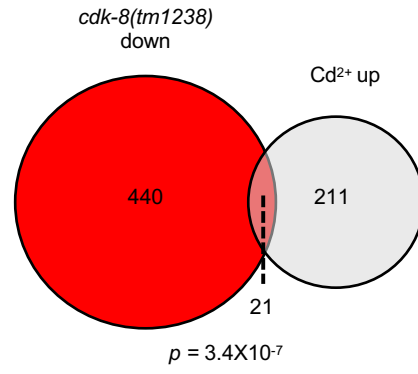

C

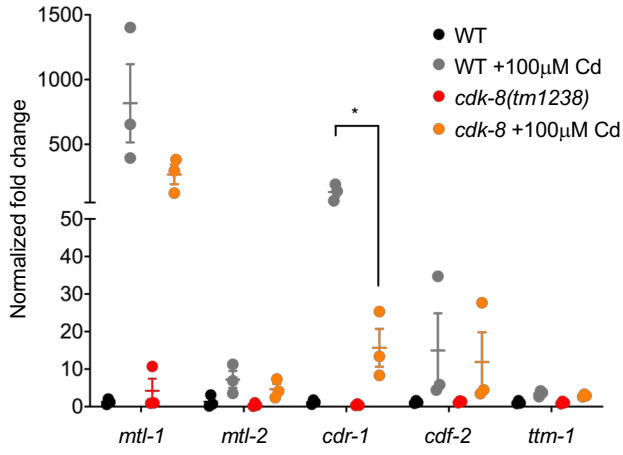

D

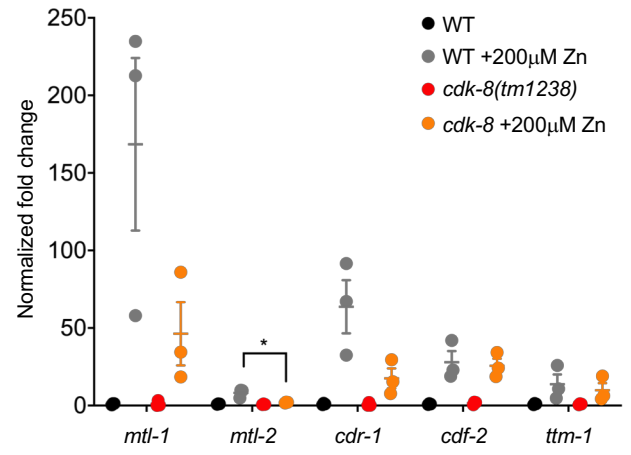

Fig 2

A

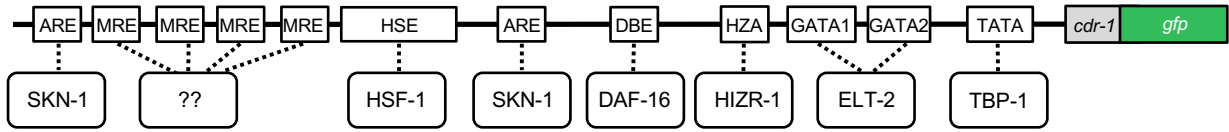

B

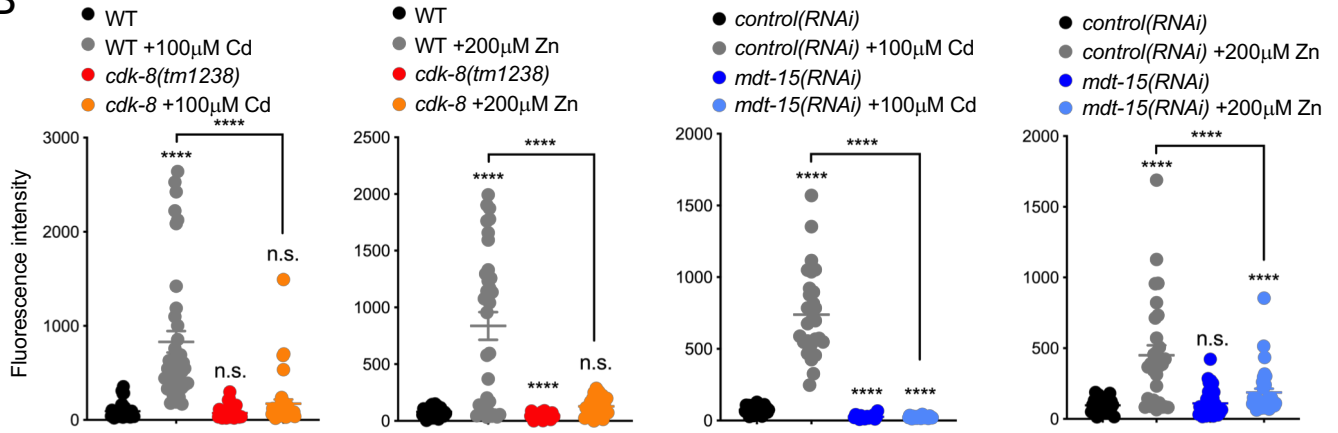

C

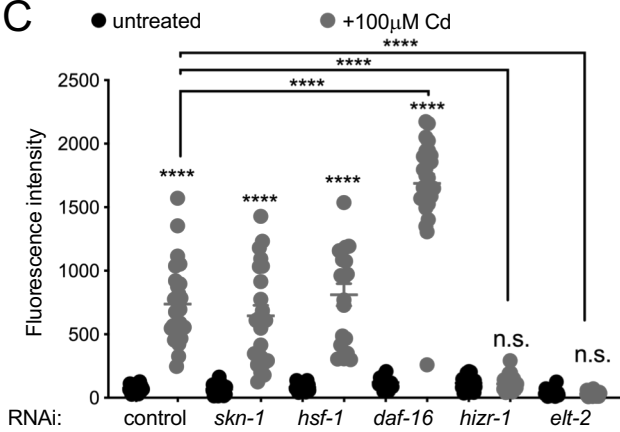

D

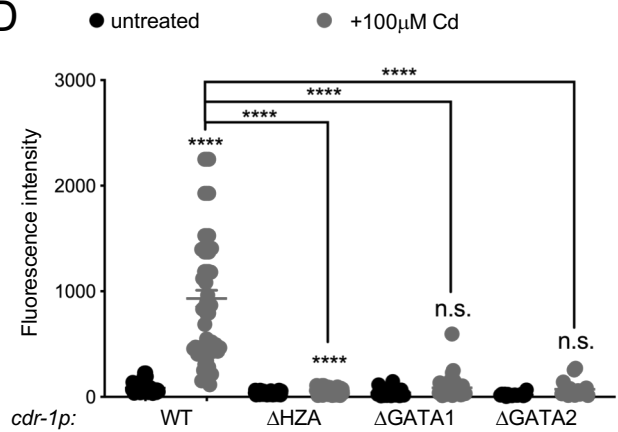

Fig 3

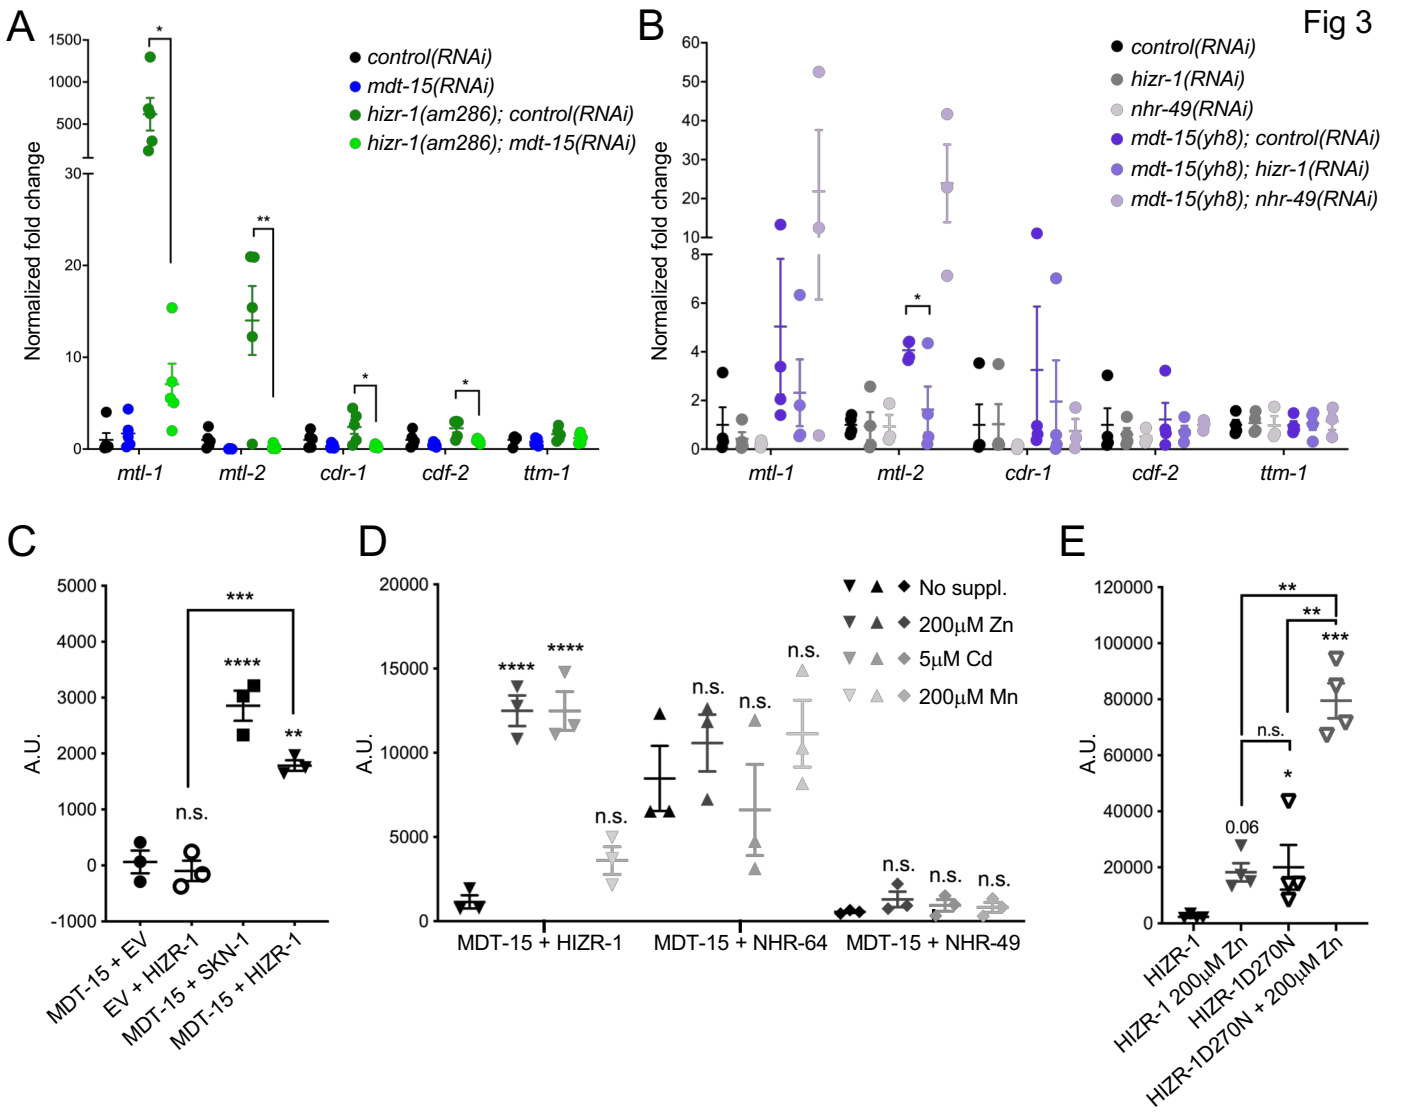

Fig 4

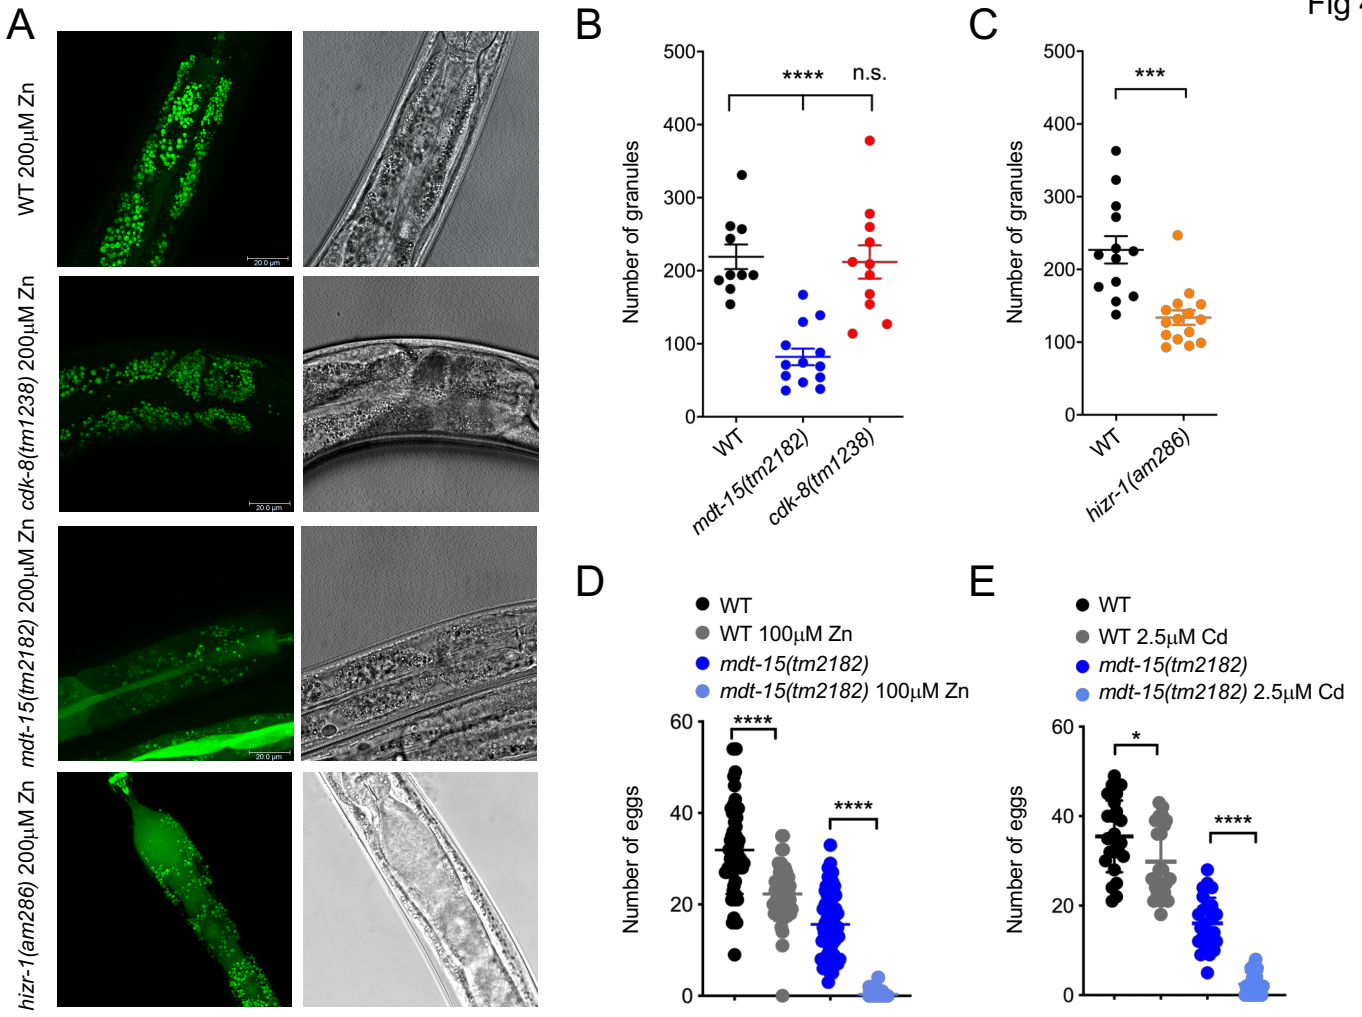

**A**

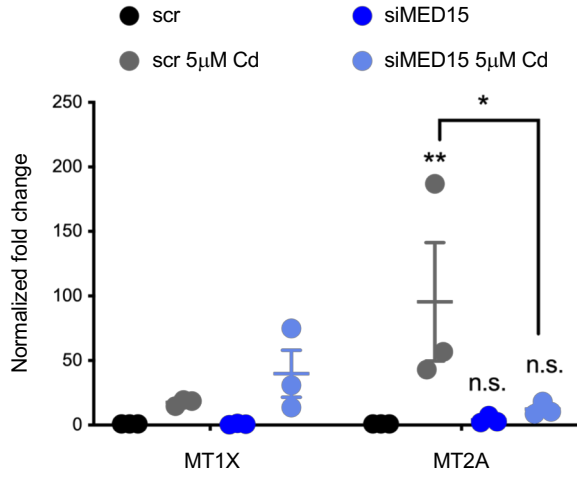

**B**

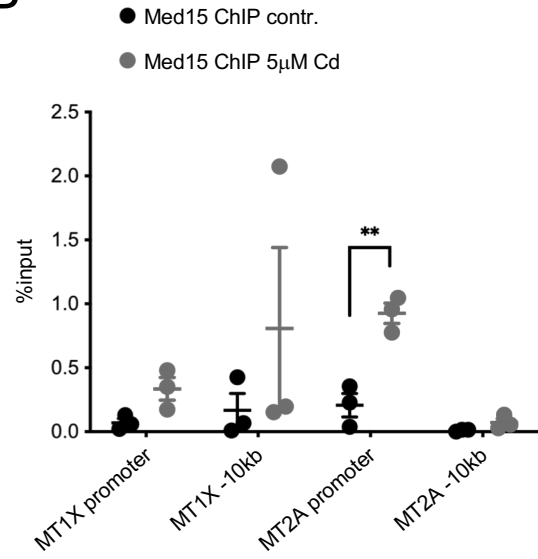

**C**

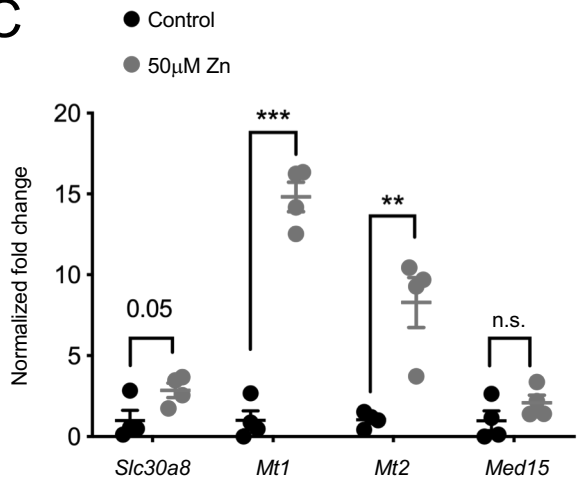

**D**

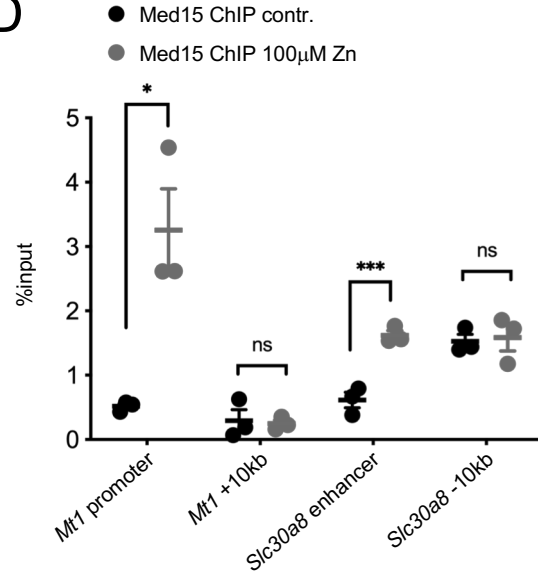



A

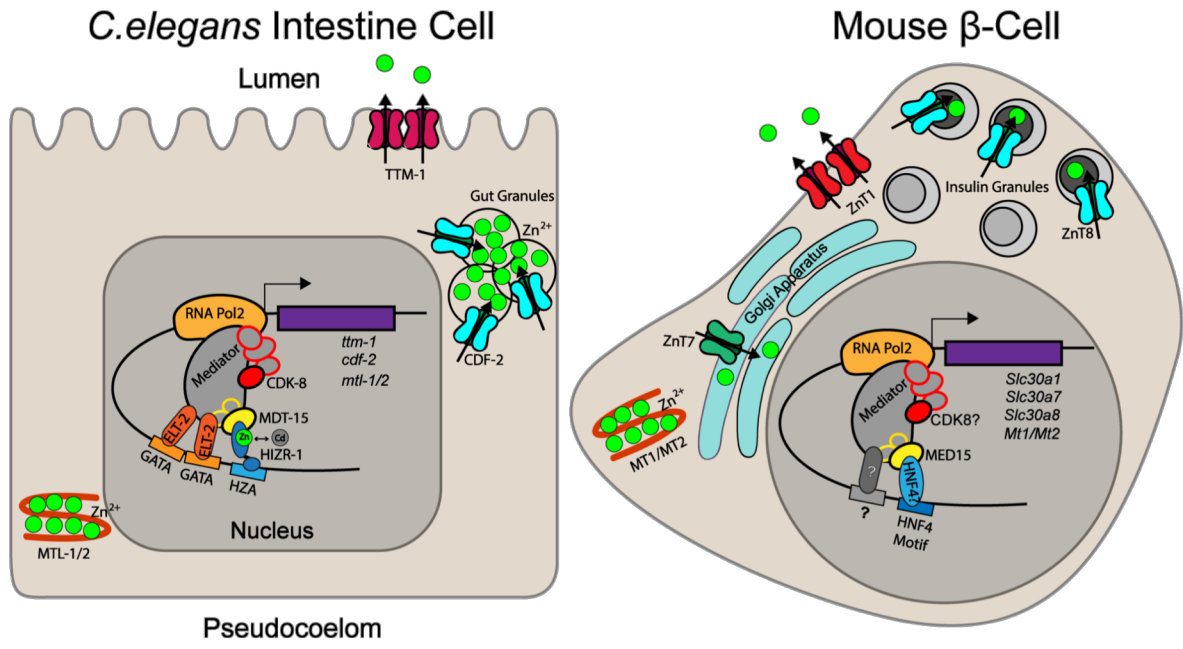

Source: https://biorxiv.org/content/biorxiv/early/2019/03/11/565739.full-text.pdf
